# Supplementary material for: Impact of Pomegranate on Probiotic Growth, Viability, Transcriptome and Metabolism
Source: MDPI journal article supplement (doi:10.3390/microorganisms11020404), 2023-02-05
Supplement: s1 [file s1]

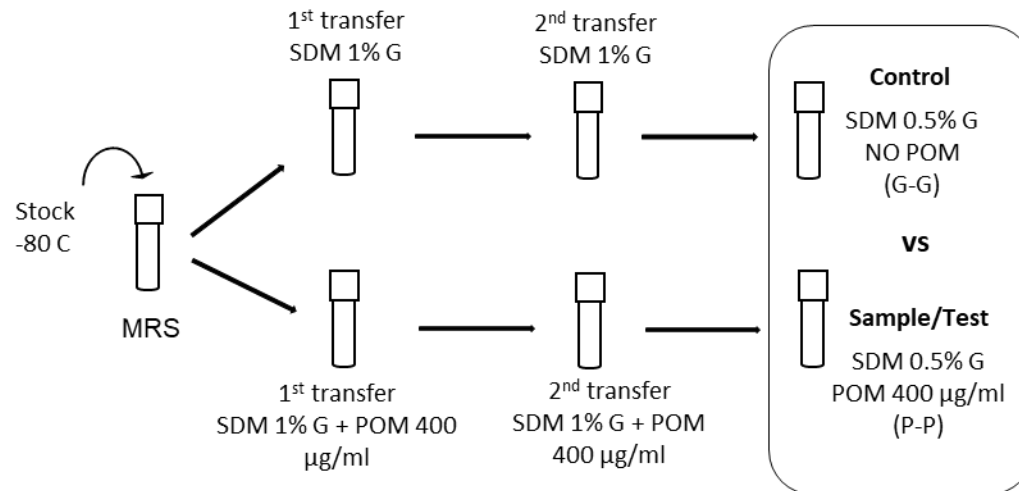

**Figure S1**

Schematic of experimental design for experiments

### Materials and Methods for Figure S2:

Strains (Table S1) were inoculated (1%) from -80°C glycerol stocks into MRS broth and grown over night at 37°C under ambient atmospheric conditions. These cultures were then used to inoculate (1%) SDM medium (1% glucose, with or without POM 400 µg/ml) for two overnight transfers at 37°C prior to growth assays. Growth assays were performed in 96 microtiter well plates in SDM (0.5% glucose, control) and SDM (0.5% glucose with 400 or 800 µg/ml POM extract). The OD 600nm was recorded every hour over 24 hours using a microtiter plate reader (BMG Technologies). Ninety six well growth assays were repeated at least twice with triplicate technical replicates for each sample.

### SDM Composition:

Kimmel, S.A.; Roberts, R.F. Development of a growth medium suitable for exopolysaccharide production by *Lactobacillus delbrueckii* ssp. *bulgaricus* RR. *Int J Food Microbiol* **1998**, *40*, 87-92, doi:10.1016/s0168-1605(98)00023-3.

The following components were weighed out and dissolved in 1L of water to make SDM medium (without glucose): 1g tween 80, 2g ammonium citrate, 5g sodium acetate, 0.1g magnesium sulfate heptahydrate, 0.05g Manganese (II) sulfate, 2g dipotassium phosphate, 5g yeast nitrogen base and 10g bacto casitone. Once dissolved the SDM was autoclaved at 121°C for 20 minutes.

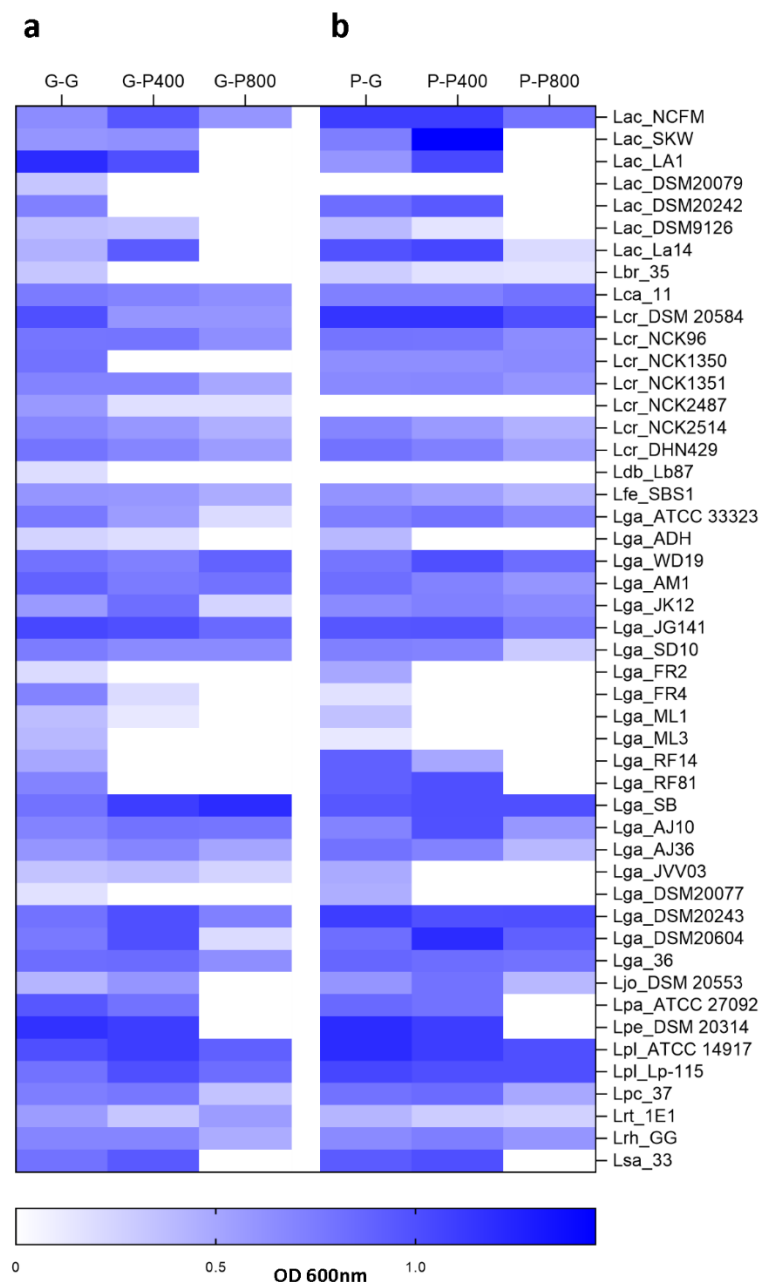

**Figure S2.** OD 600 nm values for strains transferred twice in glucose (a, control) or transferred twice in media with POM 400  $\mu\text{g/ml}$  extract (b). In panel a, G-G; transfer in SDM no POM extract and growth in SDM no POM extract, G-P400; transfer in SDM no POM extract and growth in SDM with POM 400  $\mu\text{g/ml}$  extract, G-P800; transfer in SDM no POM extract and growth in SDM with POM 800  $\mu\text{g/ml}$  extract. In panel b, P-G; transfer in SDM with POM 400  $\mu\text{g/ml}$  extract and growth in SDM no POM extract, P-P400; transfer in SDM with POM 400  $\mu\text{g/ml}$  extract and growth in SDM with POM 400  $\mu\text{g/ml}$  extract, P-P800; transfer in SDM with POM 400  $\mu\text{g/ml}$  extract and growth in SDM with POM 800  $\mu\text{g/ml}$  extract. Strain details are provided in Table S1.

**Table S1:** Table of strains used in Figure S1.

| <b>Species</b>             |                                              | <b>Strain</b> | <b>Strain Code</b> |
|----------------------------|----------------------------------------------|---------------|--------------------|
| <i>Lactobacillus</i>       | <i>acidophilus</i>                           | NCFM          | Lac_NCFM           |
| <i>Lactobacillus</i>       | <i>acidophilus</i>                           | SKW           | Lac_SKW            |
| <i>Lactobacillus</i>       | <i>acidophilus</i>                           | LA-1          | Lac_LA1            |
| <i>Lactobacillus</i>       | <i>acidophilus</i>                           | DSM-20079     | Lac_DSM20079       |
| <i>Lactobacillus</i>       | <i>acidophilus</i>                           | DSM-20242     | Lac_DSM20242       |
| <i>Lactobacillus</i>       | <i>acidophilus</i>                           | DSM-9126      | Lac_DSM9126        |
| <i>Lactobacillus</i>       | <i>acidophilus</i>                           | La-14         | Lac_La14           |
| <i>Levilactobacillus</i>   | <i>brevis</i>                                | Lbr-35        | Lbr_35             |
| <i>Lacticaseibacillus</i>  | <i>casei</i>                                 | Lc11          | Lca_11             |
| <i>Lactobacillus</i>       | <i>crispatus</i>                             | DSM 20584     | Lcr_DSM 20584      |
| <i>Lactobacillus</i>       | <i>crispatus</i>                             | NCK96         | Lcr_NCK96          |
| <i>Lactobacillus</i>       | <i>crispatus</i>                             | NCK1350       | Lcr_NCK1350        |
| <i>Lactobacillus</i>       | <i>crispatus</i>                             | NCK1351       | Lcr_NCK1351        |
| <i>Lactobacillus</i>       | <i>crispatus</i>                             | DSM-20356     | Lcr_NCK2487        |
| <i>Lactobacillus</i>       | <i>crispatus</i>                             | JV-V01        | Lcr_NCK2514        |
| <i>Lactobacillus</i>       | <i>crispatus</i>                             | DHN-429       | Lcr_DHN429         |
| <i>Lactobacillus</i>       | <i>delbreckii</i><br><i>subsp.bulgaricus</i> | Lb-87         | Ldb_Lb87           |
| <i>Limosilactobacillus</i> | <i>fermentum</i>                             | SBS-1         | Lfe_SBS1           |
| <i>Lactobacillus</i>       | <i>gasseri</i>                               | ATCC 33323    | Lga_ATCC<br>33323  |
| <i>Lactobacillus</i>       | <i>gasseri</i>                               | ADH           | Lga_ADH            |
| <i>Lactobacillus</i>       | <i>gasseri</i>                               | WD19          | Lga_WD19           |
| <i>Lactobacillus</i>       | <i>gasseri</i>                               | AM1           | Lga_AM1            |
| <i>Lactobacillus</i>       | <i>gasseri</i>                               | JK12          | Lga_JK12           |
| <i>Lactobacillus</i>       | <i>gasseri</i>                               | JG141         | Lga_JG141          |

|                            |                   |                 |                |
|----------------------------|-------------------|-----------------|----------------|
| <i>Lactobacillus</i>       | <i>gasseri</i>    | SD10            | Lga_SD10       |
| <i>Lactobacillus</i>       | <i>gasseri</i>    | FR2             | Lga_FR2        |
| <i>Lactobacillus</i>       | <i>gasseri</i>    | FR4             | Lga_FR4        |
| <i>Lactobacillus</i>       | <i>gasseri</i>    | ML1             | Lga_ML1        |
| <i>Lactobacillus</i>       | <i>gasseri</i>    | ML3             | Lga_ML3        |
| <i>Lactobacillus</i>       | <i>gasseri</i>    | RF14            | Lga_RF14       |
| <i>Lactobacillus</i>       | <i>gasseri</i>    | RF81            | Lga_RF81       |
| <i>Lactobacillus</i>       | <i>gasseri</i>    | S-B             | Lga_SB         |
| <i>Lactobacillus</i>       | <i>gasseri</i>    | AJ 10           | Lga_AJ10       |
| <i>Lactobacillus</i>       | <i>gasseri</i>    | AJ 36           | Lga_AJ36       |
| <i>Lactobacillus</i>       | <i>gasseri</i>    | JV-V03          | Lga_JVV03      |
| <i>Lactobacillus</i>       | <i>gasseri</i>    | DSM-20077       | Lga_DSM20077   |
| <i>Lactobacillus</i>       | <i>gasseri</i>    | DSM-20243       | Lga_DSM20243   |
| <i>Lactobacillus</i>       | <i>gasseri</i>    | DSM-20604       | Lga_DSM20604   |
| <i>Lactobacillus</i>       | <i>gasseri</i>    | La-36           | Lga_36         |
| <i>Lactobacillus</i>       | <i>gasseri</i>    | DSM 20553       | Ljo_DSM 20553  |
| <i>Lactobacillus</i>       | <i>johnsonii</i>  | ATCC 27092      | Lpa_ATCC 27092 |
| <i>Lactocaseibacillus</i>  | <i>paracasei</i>  | DSM 20314       | Lpe_DSM 20314  |
| <i>Lactiplantibacillus</i> | <i>pentosus</i>   | ATCC 14917      | Lpl_ATCC 14917 |
| <i>Lactiplantibacillus</i> | <i>plantarum</i>  | Lp-115          | Lpl_Lp-115     |
| <i>Lactiplantibacillus</i> | <i>plantarum</i>  | Lpc-37          | Lpc_37         |
| <i>Lactiplantibacillus</i> | <i>plantarum</i>  | 1E1             | Lrt_1E1        |
| <i>Lactocaseibacillus</i>  | <i>rhamnosus</i>  | GG (ATCC 53103) | Lrh_GG         |
| <i>Ligilactobacillus</i>   | <i>salivarius</i> | LS-33           | Lsa_33         |

**Table S2** List of differentially expressed genes from whole transcriptomic analysis

|    | <b>Lactobacillus acidophilus NCFM</b>    |                                           |                                        |
|----|------------------------------------------|-------------------------------------------|----------------------------------------|
|    | <b>Name</b>                              | <b>Differential Expression Log2 Ratio</b> | <b>Differential Expression p-value</b> |
| 1  | hypothetical protein CDS                 | 6.09                                      | 2.56E-99                               |
| 2  | hypothetical protein CDS                 | 5.92                                      | 1.38E-99                               |
| 3  | hypothetical protein CDS                 | 5.89                                      | 3.34E-86                               |
| 4  | glpF CDS                                 | 5.34                                      | 4.77E-86                               |
| 5  | NLP-P60 family secreted protein CDS      | 5.08                                      | 2.63E-77                               |
| 6  | hypothetical protein CDS                 | 4.94                                      | 1.21E-86                               |
| 7  | hypothetical protein CDS                 | 4.59                                      | 1.16E-42                               |
| 8  | aggregation promoting protein CDS        | 4.42                                      | 1.73E-73                               |
| 9  | dihydroxyacetone kinase CDS              | 4.42                                      | 3.36E-77                               |
| 10 | exoA CDS                                 | 4.21                                      | 1.34E-76                               |
| 11 | hypothetical protein CDS                 | 4.21                                      | 1.15E-60                               |
| 12 | glycosidase CDS                          | 4.12                                      | 5.89E-51                               |
| 13 | celB CDS                                 | 4.06                                      | 1.32E-47                               |
| 14 | dihydroxyacetone kinase subunit DhaK CDS | 4.01                                      | 1.77E-63                               |
| 15 | hypothetical protein CDS                 | 3.95                                      | 6.61E-44                               |
| 16 | macrolide efflux protein CDS             | 3.81                                      | 1.40E-57                               |
| 17 | permease CDS                             | 3.77                                      | 5.32E-43                               |
| 18 | lysM CDS                                 | 3.76                                      | 1.50E-35                               |
| 19 | multidrug transporter CDS                | 3.74                                      | 8.14E-40                               |
| 20 | glpF CDS                                 | 3.73                                      | 3.28E-35                               |
| 21 | peroxidase (Npx) CDS                     | 3.66                                      | 3.20E-64                               |
| 22 | PTS system transporter subunit IIA CDS   | 3.63                                      | 2.21E-33                               |
| 23 | hypothetical protein CDS                 | 3.63                                      | 1.46E-31                               |
| 24 | hypothetical protein CDS                 | 3.57                                      | 9.82E-55                               |
| 25 | hypothetical protein CDS                 | 3.55                                      | 1.09E-37                               |
| 26 | hypothetical protein CDS                 | 3.54                                      | 2.98E-52                               |
| 27 | acetyltransferase CDS                    | 3.54                                      | 1.10E-53                               |
| 28 | hypothetical protein CDS                 | 3.53                                      | 3.38E-33                               |
| 29 | hypothetical protein CDS                 | 3.51                                      | 3.45E-54                               |
| 30 | transposase CDS                          | 3.49                                      | 1.21E-49                               |
| 31 | hydrolase CDS                            | 3.49                                      | 1.79E-37                               |
| 32 | lmrB CDS                                 | 3.42                                      | 2.75E-27                               |
| 33 | hypothetical protein CDS                 | 3.40                                      | 4.60E-28                               |
| 34 | malH CDS                                 | 3.39                                      | 1.76E-42                               |
| 35 | permease CDS                             | 3.37                                      | 4.44E-41                               |
| 36 | repB CDS                                 | 3.36                                      | 1.16E-42                               |
| 37 | hypothetical protein CDS                 | 3.36                                      | 1.38E-40                               |
| 38 | hypothetical protein CDS                 | 3.36                                      | 1.52E-26                               |

|    |                                                      |      |          |
|----|------------------------------------------------------|------|----------|
| 39 | hypothetical protein CDS                             | 3.32 | 4.34E-38 |
| 40 | lysA CDS                                             | 3.30 | 8.93E-42 |
| 41 | channel-forming protein CDS                          | 3.30 | 8.03E-32 |
| 42 | amino acid permease CDS                              | 3.29 | 1.64E-35 |
| 43 | hypothetical protein CDS                             | 3.28 | 6.50E-28 |
| 44 | ackA CDS                                             | 3.27 | 2.94E-28 |
| 45 | Na-H antiporter CDS                                  | 3.23 | 2.29E-26 |
| 46 | hypothetical protein CDS                             | 3.23 | 8.10E-34 |
| 47 | xanthine-uracil permeases CDS                        | 3.22 | 5.83E-24 |
| 48 | multi-drug-type permease CDS                         | 3.14 | 2.68E-44 |
| 49 | hypothetical protein CDS                             | 3.12 | 2.10E-24 |
| 50 | hypothetical protein CDS                             | 3.11 | 9.89E-29 |
| 51 | maltose ABC transporter permease CDS                 | 3.10 | 1.74E-20 |
| 52 | 50S ribosomal protein L33 CDS                        | 3.09 | 1.87E-37 |
| 53 | hypothetical protein CDS                             | 3.08 | 1.39E-40 |
| 54 | potassium uptake protein Kup CDS                     | 3.08 | 8.16E-34 |
| 55 | PTS system arbutin-like transporter subunit IIBC CDS | 3.07 | 1.98E-28 |
| 56 | yifK CDS                                             | 3.04 | 1.79E-35 |
| 57 | aapA CDS                                             | 3.03 | 1.86E-34 |
| 58 | multidrug transporter CDS                            | 3.02 | 4.17E-27 |
| 59 | nicotinamide mononucleotide CDS                      | 3.01 | 1.44E-20 |
| 60 | hypothetical protein CDS                             | 3.00 | 6.71E-15 |
| 61 | secE CDS                                             | 3.00 | 1.57E-29 |
| 62 | dtpT CDS                                             | 2.98 | 1.33E-29 |
| 63 | hypothetical protein CDS                             | 2.95 | 2.37E-27 |
| 64 | cation transporter CDS                               | 2.94 | 2.87E-25 |
| 65 | polysaccharide transporter CDS                       | 2.94 | 1.21E-27 |
| 66 | hypothetical protein CDS                             | 2.94 | 6.22E-26 |
| 67 | hypothetical protein CDS                             | 2.93 | 2.13E-30 |
| 68 | maltose ABC transporter permease CDS                 | 2.92 | 6.99E-23 |
| 69 | hypothetical protein CDS                             | 2.90 | 3.14E-21 |
| 70 | pyrF CDS                                             | 2.90 | 4.78E-30 |
| 71 | membrane protein CDS                                 | 2.89 | 9.48E-22 |
| 72 | permease CDS                                         | 2.89 | 2.12E-37 |
| 73 | site-specific recombinase CDS                        | 2.88 | 2.82E-30 |
| 74 | clpP CDS                                             | 2.88 | 7.20E-35 |
| 75 | hypothetical protein CDS                             | 2.87 | 2.01E-34 |
| 76 | UDP-N-acetylglucosamine 1-carboxyvinyltransferase    | 2.84 | 1.86E-28 |
| 77 | pyrE CDS                                             | 2.84 | 5.69E-30 |
| 78 | gntR CDS                                             | 2.83 | 1.27E-29 |
| 79 | ssdh CDS                                             | 2.81 | 1.58E-36 |
| 80 | hypothetical protein CDS                             | 2.80 | 5.04E-26 |
| 81 | transmembrane protein CDS                            | 2.79 | 2.92E-25 |

|     |                                                                   |      |          |
|-----|-------------------------------------------------------------------|------|----------|
| 82  | hypothetical protein CDS                                          | 2.79 | 2.19E-26 |
| 83  | receptor CDS                                                      | 2.78 | 4.18E-24 |
| 84  | hypothetical protein CDS                                          | 2.78 | 7.69E-29 |
| 85  | rpsP CDS                                                          | 2.78 | 1.22E-23 |
| 86  | poxB CDS                                                          | 2.77 | 5.53E-32 |
| 87  | signal peptidase I CDS                                            | 2.77 | 5.80E-30 |
| 88  | hypothetical protein CDS                                          | 2.77 | 4.01E-31 |
| 89  | acyltransferase CDS                                               | 2.77 | 5.43E-30 |
| 90  | site-specific recombinase CDS                                     | 2.74 | 5.31E-29 |
| 91  | cell wall-associated hydrolase CDS                                | 2.73 | 1.98E-29 |
| 92  | hypothetical protein CDS                                          | 2.72 | 9.77E-27 |
| 93  | amino acid permease CDS                                           | 2.72 | 6.98E-20 |
| 94  | hypothetical protein CDS                                          | 2.72 | 6.06E-24 |
| 95  | chloride channel-like protein CDS                                 | 2.72 | 3.16E-30 |
| 96  | neopullulanase CDS                                                | 2.72 | 4.92E-23 |
| 97  | 4-methyl-5(beta-hydroxyethyl)-thiazole monophosphate synthesis    | 2.71 | 9.43E-27 |
| 98  | multidrug resistance protein CDS                                  | 2.71 | 1.44E-14 |
| 99  | uracil permease CDS                                               | 2.71 | 7.91E-18 |
| 100 | multidrug resistance protein CDS                                  | 2.70 | 1.28E-13 |
| 101 | guanylate kinase CDS                                              | 2.69 | 9.86E-30 |
| 102 | hypothetical protein CDS                                          | 2.69 | 1.79E-12 |
| 103 | amino acid permease CDS                                           | 2.69 | 3.92E-30 |
| 104 | sugar ABC transporter permease CDS                                | 2.69 | 5.09E-31 |
| 105 | 30S ribosomal protein S15 CDS                                     | 2.69 | 1.88E-21 |
| 106 | uspA CDS                                                          | 2.68 | 2.09E-23 |
| 107 | hypothetical protein CDS                                          | 2.68 | 1.43E-12 |
| 108 | hypothetical protein CDS                                          | 2.67 | 1.14E-22 |
| 109 | transporter protein CDS                                           | 2.67 | 4.07E-19 |
| 110 | oxidoreductase CDS                                                | 2.67 | 1.06E-28 |
| 111 | hypothetical protein CDS                                          | 2.67 | 3.20E-22 |
| 112 | gadC CDS                                                          | 2.66 | 1.46E-23 |
| 113 | PTS system cellobiose-specific transporter subunit IIC CDS        | 2.66 | 8.69E-20 |
| 114 | cation-transporting ATPase CDS                                    | 2.65 | 1.15E-33 |
| 115 | rpmF CDS                                                          | 2.65 | 5.48E-20 |
| 116 | ribosomal-protein-alanine N-acetyltransferase CDS                 | 2.65 | 7.01E-24 |
| 117 | rodA CDS                                                          | 2.64 | 4.25E-24 |
| 118 | rpmE2 CDS                                                         | 2.63 | 1.72E-19 |
| 119 | Na <sup>+</sup> -transporting ATP synthase CDS                    | 2.63 | 1.85E-23 |
| 120 | NAD <sup>+</sup> binding protein for K <sup>+</sup> transport CDS | 2.62 | 2.67E-26 |
| 121 | hypothetical protein CDS                                          | 2.61 | 6.58E-23 |
| 122 | portal protein CDS                                                | 2.61 | 1.06E-24 |
| 123 | prophage DNA packaging protein NU1 CDS                            | 2.60 | 5.01E-14 |
| 124 | aprT CDS                                                          | 2.60 | 3.60E-22 |

|     |                                                              |      |          |
|-----|--------------------------------------------------------------|------|----------|
| 125 | acetyltransferase CDS                                        | 2.59 | 4.95E-24 |
| 126 | amino acid permease CDS                                      | 2.58 | 5.52E-25 |
| 127 | rplJ CDS                                                     | 2.58 | 1.31E-28 |
| 128 | hypothetical protein CDS                                     | 2.56 | 5.57E-14 |
| 129 | hypothetical protein CDS                                     | 2.54 | 1.79E-22 |
| 130 | rplS CDS                                                     | 2.53 | 2.98E-19 |
| 131 | undecaprenyl-phosphatene-acetyl- glucosaminyltransferase CDS | 2.53 | 8.23E-31 |
| 132 | hypothetical protein CDS                                     | 2.53 | 2.27E-24 |
| 133 | hypothetical protein CDS                                     | 2.53 | 7.25E-22 |
| 134 | acetyltransferase CDS                                        | 2.52 | 1.58E-29 |
| 135 | hypothetical protein CDS                                     | 2.52 | 2.00E-12 |
| 136 | pgmB CDS                                                     | 2.51 | 1.86E-18 |
| 137 | hypothetical protein CDS                                     | 2.50 | 1.24E-18 |
| 138 | aa transporter CDS                                           | 2.49 | 2.47E-23 |
| 139 | hypothetical protein CDS                                     | 2.48 | 6.43E-12 |
| 140 | hypothetical protein CDS                                     | 2.48 | 1.00E-23 |
| 141 | rplU CDS                                                     | 2.48 | 1.37E-22 |
| 142 | xanthine-uracil permeases family protein CDS                 | 2.47 | 6.73E-16 |
| 143 | mucus binding protein CDS                                    | 2.47 | 3.81E-18 |
| 144 | Na <sup>+</sup> -H <sup>+</sup> antiporter CDS               | 2.46 | 1.21E-21 |
| 145 | rbsD CDS                                                     | 2.46 | 3.79E-11 |
| 146 | K <sup>+</sup> uptake protein CDS                            | 2.46 | 1.07E-22 |
| 147 | low temperature requirement A protein CDS                    | 2.46 | 7.85E-22 |
| 148 | prsA CDS                                                     | 2.43 | 1.45E-18 |
| 149 | hypothetical protein CDS                                     | 2.43 | 2.27E-18 |
| 150 | thiD CDS                                                     | 2.42 | 1.31E-27 |
| 151 | amino acid permease CDS                                      | 2.42 | 3.75E-21 |
| 152 | hypothetical protein CDS                                     | 2.42 | 4.91E-26 |
| 153 | multidrug resistance efflux pump CDS                         | 2.39 | 1.83E-17 |
| 154 | fibrinogen-binding protein CDS                               | 2.39 | 2.99E-06 |
| 155 | rpmA CDS                                                     | 2.39 | 1.85E-19 |
| 156 | glutamine amidotransferase CDS                               | 2.39 | 6.88E-24 |
| 157 | aa transporter CDS                                           | 2.38 | 7.35E-18 |
| 158 | sugar ABC transporter CDS                                    | 2.37 | 1.28E-24 |
| 159 | hypothetical protein CDS                                     | 2.37 | 7.07E-23 |
| 160 | hypothetical protein CDS                                     | 2.36 | 2.08E-21 |
| 161 | amino acid permease CDS                                      | 2.36 | 1.69E-18 |
| 162 | rpsU CDS                                                     | 2.35 | 4.55E-16 |
| 163 | site-specific recombinase CDS                                | 2.34 | 6.62E-21 |
| 164 | ldhD CDS                                                     | 2.31 | 5.12E-21 |
| 165 | permease CDS                                                 | 2.31 | 4.03E-26 |
| 166 | sugar kinase CDS                                             | 2.31 | 5.92E-20 |
| 167 | bshB CDS                                                     | 2.30 | 1.56E-21 |



|     |                                                            |      |            |
|-----|------------------------------------------------------------|------|------------|
| 168 | pyrD CDS                                                   | 2.30 | 3.92E-22   |
| 169 | hypothetical protein CDS                                   | 2.29 | 3.56E-15   |
| 170 | branched-chain amino acid transporter CDS                  | 2.29 | 3.18E-14   |
| 171 | hypothetical protein CDS                                   | 2.29 | 8.05E-15   |
| 172 | repB CDS                                                   | 2.29 | 2.27E-16   |
| 173 | hypothetical protein CDS                                   | 2.28 | 0.00101667 |
| 174 | hypothetical protein CDS                                   | 2.28 | 2.80E-12   |
| 175 | hypothetical protein CDS                                   | 2.28 | 2.29E-17   |
| 176 | hypothetical protein CDS                                   | 2.27 | 1.13E-16   |
| 177 | ldh CDS                                                    | 2.27 | 5.85E-25   |
| 178 | phospho-beta-galactosidase I CDS                           | 2.27 | 5.47E-23   |
| 179 | rplL CDS                                                   | 2.26 | 1.09E-21   |
| 180 | 3-methyladenine DNA glycosylase CDS                        | 2.26 | 2.52E-19   |
| 181 | PTS system cellobiose-specific transporter subunit IIC CDS | 2.26 | 2.90E-17   |
| 182 | fructokinase CDS                                           | 2.25 | 1.03E-15   |
| 183 | galactose-1-phosphate uridylyltransferase CDS              | 2.23 | 3.31E-21   |
| 184 | oxalyl-CoA decarboxylase CDS                               | 2.23 | 1.75E-24   |
| 185 | oligo-1,6-glucosidase CDS                                  | 2.23 | 9.20E-14   |
| 186 | cadX CDS                                                   | 2.22 | 1.26E-20   |
| 187 | ABC transporter substrate binding protein CDS              | 2.22 | 8.91E-16   |
| 188 | aspartate alanine antiporter CDS                           | 2.21 | 5.22E-13   |
| 189 | dedA CDS                                                   | 2.21 | 1.27E-19   |
| 190 | inosine-5'-monophosphate dehydrogenase CDS                 | 2.21 | 3.97E-19   |
| 191 | pyrR CDS                                                   | 2.21 | 4.04E-20   |
| 192 | epsV CDS                                                   | 2.20 | 1.50E-21   |
| 193 | hypothetical protein CDS                                   | 2.20 | 4.82E-22   |
| 194 | hypothetical protein CDS                                   | 2.20 | 6.05E-18   |
| 195 | transmembrane protein CDS                                  | 2.19 | 1.58E-20   |
| 196 | hypothetical protein CDS                                   | 2.19 | 2.32E-14   |
| 197 | hypothetical protein CDS                                   | 2.18 | 1.16E-18   |
| 198 | hypothetical protein CDS                                   | 2.17 | 1.56E-15   |
| 199 | crcB CDS                                                   | 2.17 | 2.18E-16   |
| 200 | plnI CDS                                                   | 2.17 | 2.94E-17   |
| 201 | crcB CDS                                                   | 2.17 | 4.73E-15   |
| 202 | oxidoreductase CDS                                         | 2.17 | 4.41E-23   |
| 203 | hypothetical protein CDS                                   | 2.15 | 4.36E-19   |
| 204 | celB CDS                                                   | 2.15 | 6.10E-10   |
| 205 | hypothetical protein CDS                                   | 2.15 | 3.04E-09   |
| 206 | transporter protein CDS                                    | 2.14 | 5.17E-18   |
| 207 | hypothetical protein CDS                                   | 2.14 | 1.16E-13   |
| 208 | msrA CDS                                                   | 2.13 | 3.51E-21   |
| 209 | phosphotransferase system enzyme II CDS                    | 2.12 | 1.31E-10   |
| 210 | hypothetical protein CDS                                   | 2.12 | 1.03E-14   |

|     |                                                         |      |            |
|-----|---------------------------------------------------------|------|------------|
| 211 | rhodanese-related sulfurtransferase CDS                 | 2.12 | 3.45E-15   |
| 212 | protease CDS                                            | 2.12 | 1.30E-14   |
| 213 | arsC CDS                                                | 2.12 | 1.11E-21   |
| 214 | hypothetical protein CDS                                | 2.10 | 3.93E-15   |
| 215 | pthA CDS                                                | 2.10 | 3.55E-22   |
| 216 | transcriptional regulator CDS                           | 2.10 | 1.95E-13   |
| 217 | amino acid permease CDS                                 | 2.10 | 5.44E-15   |
| 218 | HAD family hydrolase CDS                                | 2.09 | 3.90E-08   |
| 219 | glnP CDS                                                | 2.09 | 9.86E-15   |
| 220 | phosphoglycerate mutase CDS                             | 2.08 | 1.86E-18   |
| 221 | pyrR CDS                                                | 2.08 | 1.63E-10   |
| 222 | 6-phospho-beta-glucosidase CDS                          | 2.08 | 1.02E-10   |
| 223 | oppA CDS                                                | 2.07 | 8.68E-06   |
| 224 | Na <sup>+</sup> -H <sup>+</sup> -exchanging protein CDS | 2.07 | 5.35E-11   |
| 225 | oxidoreductase CDS                                      | 2.07 | 3.79E-06   |
| 226 | sugar transporter CDS                                   | 2.07 | 1.50E-11   |
| 227 | hypothetical protein CDS                                | 2.05 | 2.26E-12   |
| 228 | secG CDS                                                | 2.05 | 8.55E-12   |
| 229 | hypothetical protein CDS                                | 2.05 | 5.30E-16   |
| 230 | hypothetical protein CDS                                | 2.04 | 4.93E-17   |
| 231 | hypothetical protein CDS                                | 2.04 | 8.24E-06   |
| 232 | hypothetical protein CDS                                | 2.04 | 6.02E-16   |
| 233 | hypothetical protein CDS                                | 2.03 | 2.40E-16   |
| 234 | rpmG CDS                                                | 2.03 | 1.63E-13   |
| 235 | hypothetical protein CDS                                | 2.02 | 7.92E-18   |
| 236 | acpD CDS                                                | 2.02 | 4.18E-11   |
| 237 | mreD CDS                                                | 2.02 | 6.39E-20   |
| 238 | hypothetical protein CDS                                | 2.00 | 1.02E-13   |
| 239 | lacS CDS                                                | 2.00 | 1.35E-11   |
| 240 | epsU CDS                                                | 2.00 | 8.97E-19   |
| 241 | hypothetical protein CDS                                | 1.99 | 2.64E-19   |
| 242 | hypothetical protein CDS                                | 1.98 | 7.98E-12   |
| 243 | licT CDS                                                | 1.98 | 0.00015681 |
| 244 | rpoZ CDS                                                | 1.97 | 1.04E-15   |
| 245 | oxidoreductase CDS                                      | 1.96 | 4.33E-19   |
| 246 | hydrolase CDS                                           | 1.96 | 1.66E-17   |
| 247 | hypothetical protein CDS                                | 1.95 | 3.63E-16   |
| 248 | hypothetical protein CDS                                | 1.94 | 1.53E-16   |
| 249 | HAD family hydrolase CDS                                | 1.94 | 9.81E-06   |
| 250 | mreB CDS                                                | 1.94 | 4.76E-18   |
| 251 | hypothetical protein CDS                                | 1.94 | 8.84E-07   |
| 252 | hypothetical protein CDS                                | 1.94 | 3.36E-15   |
| 253 | hypothetical protein CDS                                | 1.94 | 1.81E-05   |

|     |                                                     |       |          |
|-----|-----------------------------------------------------|-------|----------|
| 254 | hypothetical protein CDS                            | 1.93  | 7.67E-16 |
| 255 | cysteine synthase CDS                               | 1.93  | 4.02E-05 |
| 256 | PTS system transporter subunit IIBC CDS             | 1.93  | 1.84E-13 |
| 257 | scrA CDS                                            | 1.93  | 2.88E-09 |
| 258 | oppC CDS                                            | 1.93  | 1.61E-13 |
| 259 | di-tripeptide transporter CDS                       | 1.93  | 7.11E-17 |
| 260 | rpoB CDS                                            | 1.92  | 1.02E-18 |
| 261 | rpmB CDS                                            | 1.92  | 7.94E-13 |
| 262 | glycosyltransferase CDS                             | 1.92  | 1.35E-15 |
| 263 | ftsW CDS                                            | 1.92  | 1.21E-14 |
| 264 | tuf CDS                                             | 1.92  | 3.21E-13 |
| 265 | malate permease CDS                                 | 1.92  | 2.85E-16 |
| 266 | amino acid permease CDS                             | 1.92  | 4.60E-15 |
| 267 | hypothetical protein CDS                            | 1.91  | 1.68E-12 |
| 268 | hypothetical protein CDS                            | 1.91  | 4.70E-12 |
| 269 | hypothetical protein CDS                            | 1.91  | 6.61E-15 |
| 270 | hypothetical protein CDS                            | 1.90  | 3.97E-06 |
| 271 | amino acid permease CDS                             | 1.90  | 7.81E-17 |
| 272 | hypothetical protein CDS                            | -1.90 | 1.90E-11 |
| 273 | sugar ABC transporter ATP binding protein CDS       | -1.91 | 7.63E-17 |
| 274 | transcriptional regulator CDS                       | -1.91 | 3.64E-12 |
| 275 | hypothetical protein CDS                            | -1.91 | 1.45E-16 |
| 276 | signal peptidase CDS                                | -1.91 | 5.13E-14 |
| 277 | regulator CDS                                       | -1.92 | 1.03E-05 |
| 278 | ATPase CDS                                          | -1.92 | 1.36E-15 |
| 279 | mucus binding protein CDS                           | -1.92 | 1.75E-10 |
| 280 | rplX CDS                                            | -1.93 | 2.88E-15 |
| 281 | recN CDS                                            | -1.93 | 1.78E-11 |
| 282 | infB CDS                                            | -1.93 | 1.35E-17 |
| 283 | 4-hydroxy-tetrahydronicotinate synthase CDS         | -1.93 | 5.41E-12 |
| 284 | dCMP deaminase CDS                                  | -1.93 | 2.40E-17 |
| 285 | hypothetical protein CDS                            | -1.97 | 9.63E-20 |
| 286 | DNA primase CDS                                     | -1.97 | 7.36E-18 |
| 287 | transcriptional regulator CDS                       | -1.97 | 1.40E-16 |
| 288 | DNA replication initiation control protein YabA CDS | -1.97 | 1.13E-09 |
| 289 | arginase CDS                                        | -1.98 | 6.48E-17 |
| 290 | parB CDS                                            | -1.99 | 4.01E-14 |
| 291 | purE CDS                                            | -2.00 | 6.50E-17 |
| 292 | coaE CDS                                            | -2.01 | 7.62E-13 |
| 293 | chromosome segregation protein Smc CDS              | -2.02 | 1.97E-13 |
| 294 | cbiO CDS                                            | -2.05 | 3.63E-17 |
| 295 | hypothetical protein CDS                            | -2.06 | 7.44E-16 |
| 296 | tsf CDS                                             | -2.06 | 3.39E-20 |

|     |                                         |       |           |
|-----|-----------------------------------------|-------|-----------|
| 297 | DNA polymerase III subunit delta CDS    | -2.06 | 6.02E-14  |
| 298 | cbiO CDS                                | -2.07 | 1.20E-19  |
| 299 | xerD CDS                                | -2.08 | 4.85E-19  |
| 300 | tetrapyrrole methylase CDS              | -2.08 | 6.75E-15  |
| 301 | tetR CDS                                | -2.09 | 3.34E-16  |
| 302 | tig CDS                                 | -2.10 | 1.36E-17  |
| 303 | phosphoketolase CDS                     | -2.11 | 1.97E-16  |
| 304 | cytidin monophosphate kinase CDS        | -2.12 | 2.46E-17  |
| 305 | clpX CDS                                | -2.13 | 2.45E-22  |
| 306 | L7A family ribosomal protein CDS        | -2.14 | 8.28E-19  |
| 307 | hypothetical protein CDS                | -2.14 | 4.77E-17  |
| 308 | glycoprotein endopeptidase CDS          | -2.15 | 1.24E-16  |
| 309 | rpsB CDS                                | -2.21 | 2.51E-21  |
| 310 | hypothetical protein CDS                | -2.26 | 2.82E-19  |
| 311 | hypothetical protein CDS                | -2.27 | 2.11E-05  |
| 312 | hypothetical protein CDS                | -2.29 | 3.75E-17  |
| 313 | fmtB CDS                                | -2.29 | 1.41E-18  |
| 314 | ribT CDS                                | -2.30 | 4.21E-18  |
| 315 | dehydrogenase CDS                       | -2.31 | 7.34E-20  |
| 316 | hypothetical protein CDS                | -2.33 | 1.54E-18  |
| 317 | ADP-ribose pyrophosphatase CDS          | -2.35 | 2.54E-20  |
| 318 | miaA CDS                                | -2.36 | 5.99E-21  |
| 319 | 2-deoxyribose-5-phosphate aldolase CDS  | -2.39 | 1.26E-25  |
| 320 | capsid protein CDS                      | -2.44 | 4.96E-17  |
| 321 | hypothetical protein CDS                | -2.46 | 1.14E-20  |
| 322 | cold-shock protein CDS                  | -2.46 | 4.27E-22  |
| 323 | hypothetical protein CDS                | -2.57 | 2.92E-08  |
| 324 | gntR CDS                                | -2.61 | 1.27E-23  |
| 325 | hypothetical protein CDS                | -2.72 | 2.73E-17  |
| 326 | transcriptional regulator CDS           | -3.04 | 5.36E-13  |
| 327 | hypothetical protein CDS                | -3.88 | 1.50E-60  |
| 328 | hypothetical protein CDS                | -3.97 | 2.65E-35  |
| 329 | hypothetical protein CDS                | -4.19 | 5.14E-64  |
| 330 | hypothetical protein CDS                | -4.39 | 9.09E-43  |
| 331 | hypothetical protein CDS                | -4.44 | 3.18E-64  |
| 332 | hypothetical protein CDS                | -4.71 | 1.55E-49  |
| 333 | plnG CDS                                | -4.82 | 7.59E-85  |
| 334 | response regulator CDS                  | -4.87 | 4.94E-104 |
| 335 | ABC transporter ATP-binding protein CDS | -4.90 | 1.59E-64  |
| 336 | hypothetical protein CDS                | -4.96 | 5.36E-40  |
| 337 | hypothetical protein CDS                | -4.99 | 6.71E-39  |
| 338 | hypothetical protein CDS                | -5.32 | 1.03E-95  |
| 339 | hypothetical protein CDS                | -5.42 | 5.34E-67  |

|                                   |                                                  |                                           |                                        |
|-----------------------------------|--------------------------------------------------|-------------------------------------------|----------------------------------------|
| 340                               | gassericin K7 B accessory protein CDS            | -5.64                                     | 2.80E-73                               |
| 341                               | hypothetical protein CDS                         | -5.66                                     | 1.94E-124                              |
| 342                               | histidine kinase CDS                             | -5.88                                     | 2.30E-146                              |
|                                   |                                                  |                                           |                                        |
| <b>Lactobacillus rhamnosus GG</b> |                                                  |                                           |                                        |
|                                   | <b>Name</b>                                      | <b>Differential Expression Log2 Ratio</b> | <b>Differential Expression p-value</b> |
| 1                                 | ecdB CDS                                         | 5.41                                      | 1.07E-195                              |
| 2                                 | bsdC CDS                                         | 5.32                                      | 5.50E-218                              |
| 3                                 | hypothetical protein CDS                         | 5.27                                      | 0                                      |
| 4                                 | hypothetical protein CDS                         | 4.56                                      | 4.49E-13                               |
| 5                                 | ribZ 1 CDS                                       | 4.56                                      | 0                                      |
| 6                                 | putative ABC transporter ATP-binding protein CDS | 4.48                                      | 1.92E-144                              |
| 7                                 | hypothetical protein CDS                         | 4.43                                      | 0                                      |
| 8                                 | hypothetical protein CDS                         | 4.19                                      | 5.29E-140                              |
| 9                                 | hypothetical protein CDS                         | 4.02                                      | 6.78E-305                              |
| 10                                | ribU CDS                                         | 3.91                                      | 0                                      |
| 11                                | yhdG 1 CDS                                       | 3.90                                      | 0                                      |
| 12                                | hypothetical protein CDS                         | 3.89                                      | 0                                      |
| 13                                | hypothetical protein CDS                         | 3.88                                      | 0                                      |
| 14                                | uidB CDS                                         | 3.81                                      | 8.53E-121                              |
| 15                                | hypothetical protein CDS                         | 3.76                                      | 5.41E-112                              |
| 16                                | mepA CDS                                         | 3.65                                      | 0                                      |
| 17                                | pgpB CDS                                         | 3.63                                      | 9.08E-202                              |
| 18                                | ybiR CDS                                         | 3.59                                      | 2.06E-297                              |
| 19                                | hypothetical protein CDS                         | 3.57                                      | 9.03E-13                               |
| 20                                | hypothetical protein CDS                         | 3.55                                      | 5.62E-88                               |
| 21                                | hypothetical protein CDS                         | 3.55                                      | 0                                      |
| 22                                | hypothetical protein CDS                         | 3.53                                      | 4.29E-124                              |
| 23                                | hypothetical protein CDS                         | 3.52                                      | 1.25E-23                               |
| 24                                | hypothetical protein CDS                         | 3.52                                      | 2.17E-52                               |
| 25                                | hypothetical protein CDS                         | 3.51                                      | 0                                      |
| 26                                | queT 2 CDS                                       | 3.51                                      | 1.25E-251                              |
| 27                                | emrB 1 CDS                                       | 3.50                                      | 1.05E-223                              |
| 28                                | thiT CDS                                         | 3.50                                      | 1.23E-294                              |
| 29                                | ssiT CDS                                         | 3.47                                      | 4.10E-238                              |
| 30                                | yicL 1 CDS                                       | 3.45                                      | 8.19E-262                              |
| 31                                | hypothetical protein CDS                         | 3.44                                      | 2.02E-285                              |
| 32                                | hypothetical protein CDS                         | 3.42                                      | 2.24E-92                               |
| 33                                | hypothetical protein CDS                         | 3.41                                      | 5.22E-52                               |
| 34                                | hypothetical protein CDS                         | 3.41                                      | 4.72E-219                              |
| 35                                | ISNCY family transposase ISSeq2 CDS              | 3.40                                      | 0                                      |
| 36                                | bglF 3 CDS                                       | 3.34                                      | 3.02E-234                              |

|    |                          |      |           |
|----|--------------------------|------|-----------|
| 37 | hypothetical protein CDS | 3.34 | 1.99E-22  |
| 38 | ydfK CDS                 | 3.33 | 0         |
| 39 | hypothetical protein CDS | 3.33 | 2.24E-175 |
| 40 | plsY CDS                 | 3.29 | 2.13E-298 |
| 41 | hypothetical protein CDS | 3.29 | 9.28E-96  |
| 42 | ycaM 1 CDS               | 3.28 | 1.12E-178 |
| 43 | hypothetical protein CDS | 3.28 | 3.65E-149 |
| 44 | hypothetical protein CDS | 3.27 | 0         |
| 45 | hypothetical protein CDS | 3.23 | 0         |
| 46 | hypothetical protein CDS | 3.23 | 2.61E-61  |
| 47 | bacF CDS                 | 3.23 | 7.50E-43  |
| 48 | nhaK 1 CDS               | 3.23 | 3.00E-277 |
| 49 | glpF CDS                 | 3.20 | 1.41E-70  |
| 50 | ygaZ CDS                 | 3.19 | 1.79E-70  |
| 51 | hypothetical protein CDS | 3.18 | 9.83E-258 |
| 52 | hypothetical protein CDS | 3.16 | 1.64E-50  |
| 53 | glnP CDS                 | 3.15 | 1.38E-211 |
| 54 | dlpT CDS                 | 3.15 | 0         |
| 55 | appC CDS                 | 3.13 | 8.50E-89  |
| 56 | hypothetical protein CDS | 3.11 | 7.73E-194 |
| 57 | hypothetical protein CDS | 3.11 | 2.20E-165 |
| 58 | hypothetical protein CDS | 3.09 | 5.99E-82  |
| 59 | hypothetical protein CDS | 3.09 | 9.42E-74  |
| 60 | hypothetical protein CDS | 3.08 | 0         |
| 61 | psiE CDS                 | 3.05 | 3.74E-155 |
| 62 | hypothetical protein CDS | 3.04 | 6.62E-19  |
| 63 | hypothetical protein CDS | 3.04 | 7.50E-255 |
| 64 | hypothetical protein CDS | 3.03 | 1.79E-201 |
| 65 | hypothetical protein CDS | 3.02 | 6.80E-141 |
| 66 | hypothetical protein CDS | 3.02 | 2.54E-148 |
| 67 | hypothetical protein CDS | 3.02 | 2.09E-176 |
| 68 | bglF 2 CDS               | 3.01 | 2.37E-62  |
| 69 | casI CDS                 | 2.99 | 2.67E-138 |
| 70 | znuB CDS                 | 2.98 | 9.62E-186 |
| 71 | amt CDS                  | 2.97 | 3.22E-57  |
| 72 | fecE CDS                 | 2.97 | 9.78E-28  |
| 73 | hypothetical protein CDS | 2.97 | 1.90E-134 |
| 74 | hsrA 2 CDS               | 2.97 | 6.76E-94  |
| 75 | ycaM 2 CDS               | 2.97 | 2.08E-285 |
| 76 | hypothetical protein CDS | 2.94 | 4.40E-195 |
| 77 | hypothetical protein CDS | 2.93 | 2.32E-137 |
| 78 | hypothetical protein CDS | 2.93 | 8.42E-280 |
| 79 | ykoD 1 CDS               | 2.90 | 1.04E-12  |

|     |                          |      |           |
|-----|--------------------------|------|-----------|
| 80  | btuD 19 CDS              | 2.89 | 1.68E-144 |
| 81  | hypothetical protein CDS | 2.89 | 3.26E-168 |
| 82  | adeP CDS                 | 2.89 | 5.66E-267 |
| 83  | hypothetical protein CDS | 2.88 | 6.60E-104 |
| 84  | hypothetical protein CDS | 2.88 | 4.35E-49  |
| 85  | hypothetical protein CDS | 2.87 | 2.06E-268 |
| 86  | folT CDS                 | 2.85 | 2.16E-286 |
| 87  | patB 1 CDS               | 2.84 | 1.09E-65  |
| 88  | frlD CDS                 | 2.84 | 3.82E-223 |
| 89  | hypothetical protein CDS | 2.83 | 1.27E-225 |
| 90  | hypothetical protein CDS | 2.83 | 2.65E-210 |
| 91  | bmr3 2 CDS               | 2.83 | 1.47E-123 |
| 92  | ybhL CDS                 | 2.82 | 3.13E-269 |
| 93  | hypothetical protein CDS | 2.82 | 8.96E-264 |
| 94  | hypothetical protein CDS | 2.81 | 1.40E-13  |
| 95  | yafV CDS                 | 2.79 | 2.66E-17  |
| 96  | hypothetical protein CDS | 2.79 | 3.41E-207 |
| 97  | rpmB CDS                 | 2.79 | 1.46E-250 |
| 98  | hypothetical protein CDS | 2.79 | 1.15E-12  |
| 99  | hypothetical protein CDS | 2.78 | 6.01E-131 |
| 100 | hypothetical protein CDS | 2.78 | 6.59E-33  |
| 101 | hypothetical protein CDS | 2.78 | 1.01E-67  |
| 102 | ypdE CDS                 | 2.78 | 7.12E-30  |
| 103 | lacF 1 CDS               | 2.78 | 1.15E-27  |
| 104 | hypothetical protein CDS | 2.77 | 1.66E-19  |
| 105 | hypothetical protein CDS | 2.77 | 1.85E-136 |
| 106 | gla CDS                  | 2.77 | 1.01E-234 |
| 107 | hypothetical protein CDS | 2.77 | 5.11E-13  |
| 108 | lspA CDS                 | 2.76 | 1.24E-164 |
| 109 | yycJ CDS                 | 2.75 | 5.05E-149 |
| 110 | hypothetical protein CDS | 2.75 | 1.95E-181 |
| 111 | hypothetical protein CDS | 2.75 | 1.79E-47  |
| 112 | recD2 2 CDS              | 2.74 | 3.76E-175 |
| 113 | hypothetical protein CDS | 2.74 | 1.02E-228 |
| 114 | cycA CDS                 | 2.73 | 2.90E-239 |
| 115 | hypothetical protein CDS | 2.73 | 7.31E-21  |
| 116 | hypothetical protein CDS | 2.73 | 1.66E-166 |
| 117 | hypothetical protein CDS | 2.73 | 1.09E-34  |
| 118 | hypothetical protein CDS | 2.72 | 5.65E-53  |
| 119 | hypothetical protein CDS | 2.71 | 1.96E-164 |
| 120 | hypothetical protein CDS | 2.70 | 1.33E-89  |
| 121 | zapA CDS                 | 2.70 | 6.15E-101 |
| 122 | yhfP CDS                 | 2.66 | 8.23E-174 |

|     |                                   |      |           |
|-----|-----------------------------------|------|-----------|
| 123 | chbC CDS                          | 2.66 | 4.82E-157 |
| 124 | hypothetical protein CDS          | 2.66 | 1.18E-85  |
| 125 | hypothetical protein CDS          | 2.65 | 8.73E-16  |
| 126 | hypothetical protein CDS          | 2.64 | 1.68E-43  |
| 127 | yfcA CDS                          | 2.64 | 2.83E-52  |
| 128 | mdtG CDS                          | 2.64 | 2.49E-183 |
| 129 | hypothetical protein CDS          | 2.64 | 4.79E-149 |
| 130 | lysP 2 CDS                        | 2.64 | 4.63E-164 |
| 131 | rbsR CDS                          | 2.63 | 5.88E-149 |
| 132 | dedA CDS                          | 2.63 | 4.82E-240 |
| 133 | hypothetical protein CDS          | 2.63 | 6.58E-165 |
| 134 | hypothetical protein CDS          | 2.63 | 1.67E-36  |
| 135 | csp CDS                           | 2.63 | 2.91E-191 |
| 136 | rex 1 CDS                         | 2.63 | 1.07E-95  |
| 137 | hypothetical protein CDS          | 2.62 | 7.33E-44  |
| 138 | hypothetical protein CDS          | 2.62 | 4.22E-210 |
| 139 | ytIR CDS                          | 2.62 | 1.22E-231 |
| 140 | hypothetical protein CDS          | 2.62 | 4.21E-12  |
| 141 | metQ 4 CDS                        | 2.61 | 5.12E-19  |
| 142 | hypothetical protein CDS          | 2.61 | 5.11E-199 |
| 143 | queT 1 CDS                        | 2.61 | 1.52E-256 |
| 144 | Calcium-transporting ATPase 1 CDS | 2.60 | 3.00E-61  |
| 145 | hypothetical protein CDS          | 2.60 | 6.29E-71  |
| 146 | hypothetical protein CDS          | 2.60 | 1.30E-181 |
| 147 | hypothetical protein CDS          | 2.59 | 2.52E-119 |
| 148 | hypothetical protein CDS          | 2.57 | 4.91E-229 |
| 149 | hypothetical protein CDS          | 2.57 | 8.38E-207 |
| 150 | tadA 2 CDS                        | 2.55 | 5.90E-79  |
| 151 | murB CDS                          | 2.54 | 3.27E-154 |
| 152 | oppC 1 CDS                        | 2.53 | 1.48E-226 |
| 153 | hypothetical protein CDS          | 2.53 | 8.04E-126 |
| 154 | hypothetical protein CDS          | 2.53 | 5.19E-176 |
| 155 | pyrR CDS                          | 2.53 | 2.52E-68  |
| 156 | hypothetical protein CDS          | 2.53 | 1.38E-143 |
| 157 | hypothetical protein CDS          | 2.52 | 1.72E-149 |
| 158 | glnM CDS                          | 2.52 | 2.45E-134 |
| 159 | ulaA 1 CDS                        | 2.52 | 3.82E-59  |
| 160 | hypothetical protein CDS          | 2.51 | 4.79E-20  |
| 161 | cydB 1 CDS                        | 2.51 | 7.60E-29  |
| 162 | ypdF 1 CDS                        | 2.51 | 3.59E-49  |
| 163 | hypothetical protein CDS          | 2.51 | 3.44E-06  |
| 164 | apu CDS                           | 2.50 | 2.71E-209 |
| 165 | hadL CDS                          | 2.49 | 1.43E-52  |



|     |                          |      |            |
|-----|--------------------------|------|------------|
| 166 | yveA CDS                 | 2.48 | 9.55E-189  |
| 167 | hypothetical protein CDS | 2.48 | 0.00078105 |
| 168 | hypothetical protein CDS | 2.48 | 6.78E-18   |
| 169 | hypothetical protein CDS | 2.47 | 2.88E-96   |
| 170 | hypothetical protein CDS | 2.47 | 1.70E-152  |
| 171 | malL 1 CDS               | 2.46 | 6.07E-39   |
| 172 | hypothetical protein CDS | 2.45 | 3.16E-126  |
| 173 | hypothetical protein CDS | 2.45 | 1.04E-91   |
| 174 | hypothetical protein CDS | 2.45 | 1.31E-65   |
| 175 | hypothetical protein CDS | 2.43 | 9.38E-130  |
| 176 | hypothetical protein CDS | 2.43 | 1.56E-06   |
| 177 | ribZ 6 CDS               | 2.43 | 3.67E-120  |
| 178 | arnT CDS                 | 2.42 | 1.70E-37   |
| 179 | treP CDS                 | 2.42 | 9.70E-16   |
| 180 | bceA 1 CDS               | 2.41 | 2.64E-121  |
| 181 | hypothetical protein CDS | 2.41 | 4.81E-131  |
| 182 | gbuB CDS                 | 2.40 | 9.32E-69   |
| 183 | hypothetical protein CDS | 2.40 | 2.70E-164  |
| 184 | potB CDS                 | 2.40 | 2.91E-121  |
| 185 | hypothetical protein CDS | 2.39 | 2.21E-37   |
| 186 | hypothetical protein CDS | 2.39 | 2.02E-171  |
| 187 | hypothetical protein CDS | 2.39 | 1.31E-147  |
| 188 | hypothetical protein CDS | 2.38 | 1.28E-67   |
| 189 | hypothetical protein CDS | 2.37 | 1.67E-68   |
| 190 | hypothetical protein CDS | 2.37 | 2.09E-146  |
| 191 | hypothetical protein CDS | 2.37 | 4.75E-140  |
| 192 | mntB CDS                 | 2.37 | 1.24E-18   |
| 193 | hypothetical protein CDS | 2.37 | 3.69E-63   |
| 194 | hypothetical protein CDS | 2.36 | 1.53E-17   |
| 195 | ycaC CDS                 | 2.35 | 2.03E-151  |
| 196 | iolT 2 CDS               | 2.34 | 9.18E-127  |
| 197 | hypothetical protein CDS | 2.34 | 2.81E-100  |
| 198 | hypothetical protein CDS | 2.34 | 2.52E-142  |
| 199 | mscL CDS                 | 2.33 | 6.13E-105  |
| 200 | hypothetical protein CDS | 2.32 | 6.28E-40   |
| 201 | hypothetical protein CDS | 2.30 | 5.51E-75   |
| 202 | amtB CDS                 | 2.30 | 4.88E-12   |
| 203 | hypothetical protein CDS | 2.29 | 2.78E-152  |
| 204 | hypothetical protein CDS | 2.29 | 1.41E-84   |
| 205 | hypothetical protein CDS | 2.29 | 4.27E-08   |
| 206 | hypothetical protein CDS | 2.29 | 1.24E-111  |
| 207 | btuD 3 CDS               | 2.29 | 6.79E-78   |
| 208 | fni CDS                  | 2.29 | 1.43E-126  |

|     |                                         |      |           |
|-----|-----------------------------------------|------|-----------|
| 209 | hypothetical protein CDS                | 2.29 | 3.68E-36  |
| 210 | degA 1 CDS                              | 2.29 | 2.47E-133 |
| 211 | hypothetical protein CDS                | 2.28 | 1.58E-76  |
| 212 | hypothetical protein CDS                | 2.28 | 4.46E-125 |
| 213 | hypothetical protein CDS                | 2.27 | 1.27E-65  |
| 214 | galK 2 CDS                              | 2.26 | 1.22E-70  |
| 215 | hypothetical protein CDS                | 2.26 | 4.58E-21  |
| 216 | ribZ 3 CDS                              | 2.26 | 1.06E-129 |
| 217 | fas6 CDS                                | 2.25 | 2.52E-158 |
| 218 | glcU CDS                                | 2.24 | 2.61E-145 |
| 219 | hypothetical protein CDS                | 2.24 | 1.06E-35  |
| 220 | hypothetical protein CDS                | 2.24 | 5.25E-147 |
| 221 | gbuC CDS                                | 2.24 | 2.29E-50  |
| 222 | hypothetical protein CDS                | 2.24 | 1.22E-84  |
| 223 | hypothetical protein CDS                | 2.23 | 8.44E-81  |
| 224 | hypothetical protein CDS                | 2.23 | 7.46E-07  |
| 225 | hypothetical protein CDS                | 2.23 | 4.00E-93  |
| 226 | hypothetical protein CDS                | 2.23 | 3.92E-112 |
| 227 | hypothetical protein CDS                | 2.23 | 2.65E-146 |
| 228 | yicL 2 CDS                              | 2.22 | 7.22E-117 |
| 229 | rhaB 2 CDS                              | 2.22 | 3.80E-16  |
| 230 | ycaM 3 CDS                              | 2.21 | 6.71E-133 |
| 231 | obg CDS                                 | 2.20 | 3.99E-171 |
| 232 | hmo CDS                                 | 2.20 | 1.17E-85  |
| 233 | hypothetical protein CDS                | 2.19 | 4.74E-125 |
| 234 | folA CDS                                | 2.19 | 8.44E-143 |
| 235 | rmhA 1 CDS                              | 2.18 | 1.04E-89  |
| 236 | mleS CDS                                | 2.18 | 7.09E-67  |
| 237 | hypothetical protein CDS                | 2.18 | 2.26E-20  |
| 238 | secG CDS                                | 2.18 | 1.66E-141 |
| 239 | hypothetical protein CDS                | 2.18 | 4.58E-22  |
| 240 | hypothetical protein CDS                | 2.18 | 1.24E-137 |
| 241 | meIA CDS                                | 2.18 | 1.32E-105 |
| 242 | hypothetical protein CDS                | 2.17 | 8.58E-66  |
| 243 | Putative glutamine amidotransferase CDS | 2.17 | 1.59E-111 |
| 244 | hypothetical protein CDS                | 2.16 | 1.46E-25  |
| 245 | pyrP CDS                                | 2.16 | 1.89E-139 |
| 246 | mprF CDS                                | 2.15 | 2.15E-155 |
| 247 | clcA 2 CDS                              | 2.14 | 2.04E-156 |
| 248 | hypothetical protein CDS                | 2.14 | 2.89E-30  |
| 249 | hypothetical protein CDS                | 2.14 | 3.89E-80  |
| 250 | bmr3 1 CDS                              | 2.14 | 2.69E-115 |
| 251 | nhaK 2 CDS                              | 2.13 | 5.35E-120 |

|     |                                                  |      |            |
|-----|--------------------------------------------------|------|------------|
| 252 | hypothetical protein CDS                         | 2.13 | 6.49E-119  |
| 253 | hypothetical protein CDS                         | 2.13 | 4.84E-11   |
| 254 | hypothetical protein CDS                         | 2.13 | 1.42E-48   |
| 255 | hypothetical protein CDS                         | 2.13 | 1.03E-134  |
| 256 | hypothetical protein CDS                         | 2.12 | 1.21E-71   |
| 257 | zosA 1 CDS                                       | 2.12 | 1.14E-16   |
| 258 | hypothetical protein CDS                         | 2.12 | 1.32E-120  |
| 259 | hypothetical protein CDS                         | 2.12 | 4.73E-36   |
| 260 | hypothetical protein CDS                         | 2.11 | 1.31E-71   |
| 261 | uup CDS                                          | 2.11 | 4.95E-48   |
| 262 | murJ 1 CDS                                       | 2.11 | 6.92E-158  |
| 263 | zur CDS                                          | 2.10 | 2.46E-48   |
| 264 | hypothetical protein CDS                         | 2.10 | 1.27E-128  |
| 265 | IS66 family transposase ISSwo2 CDS               | 2.10 | 5.42E-46   |
| 266 | recQ 1 CDS                                       | 2.10 | 1.56E-125  |
| 267 | hypothetical protein CDS                         | 2.10 | 5.61E-90   |
| 268 | hypothetical protein CDS                         | 2.09 | 2.22E-11   |
| 269 | hypothetical protein CDS                         | 2.09 | 5.28E-22   |
| 270 | ykoE CDS                                         | 2.09 | 0.00154146 |
| 271 | yidA 1 CDS                                       | 2.09 | 1.73E-89   |
| 272 | atzA CDS                                         | 2.09 | 1.71E-165  |
| 273 | kup CDS                                          | 2.08 | 1.67E-123  |
| 274 | comFA CDS                                        | 2.08 | 2.25E-16   |
| 275 | hypothetical protein CDS                         | 2.08 | 2.68E-23   |
| 276 | hypothetical protein CDS                         | 2.08 | 2.25E-12   |
| 277 | ftsW CDS                                         | 2.07 | 2.30E-111  |
| 278 | hypothetical protein CDS                         | 2.07 | 3.43E-87   |
| 279 | hypothetical protein CDS                         | 2.06 | 1.89E-106  |
| 280 | kduD CDS                                         | 2.06 | 1.13E-130  |
| 281 | hypothetical protein CDS                         | 2.06 | 7.89E-92   |
| 282 | hypothetical protein CDS                         | 2.05 | 2.27E-24   |
| 283 | putative ABC transporter ATP-binding protein CDS | 2.05 | 4.35E-07   |
| 284 | hypothetical protein CDS                         | 2.05 | 0.00013315 |
| 285 | czcD CDS                                         | 2.05 | 2.01E-132  |
| 286 | hypothetical protein CDS                         | 2.05 | 7.32E-67   |
| 287 | ymfD CDS                                         | 2.05 | 8.30E-14   |
| 288 | hypothetical protein CDS                         | 2.04 | 8.00E-117  |
| 289 | hypothetical protein CDS                         | 2.03 | 1.52E-152  |
| 290 | hypothetical protein CDS                         | 2.03 | 0.00019077 |
| 291 | lolD 1 CDS                                       | 2.03 | 3.45E-46   |
| 292 | lysP 1 CDS                                       | 2.03 | 3.11E-23   |
| 293 | rnhA 2 CDS                                       | 2.03 | 4.36E-128  |
| 294 | bglH 2 CDS                                       | 2.03 | 5.01E-28   |

|     |                                                                       |       |            |
|-----|-----------------------------------------------------------------------|-------|------------|
| 295 | hypothetical protein CDS                                              | 2.03  | 1.15E-88   |
| 296 | minJ CDS                                                              | 2.02  | 6.21E-143  |
| 297 | rbsK/rbiA CDS                                                         | 2.02  | 1.22E-92   |
| 298 | hypothetical protein CDS                                              | 2.02  | 1.15E-42   |
| 299 | hypothetical protein CDS                                              | 2.02  | 1.20E-14   |
| 300 | ribZ 8 CDS                                                            | 2.02  | 1.65E-32   |
| 301 | smc 3 CDS                                                             | 2.02  | 8.19E-24   |
| 302 | hypothetical protein CDS                                              | 2.01  | 1.34E-60   |
| 303 | licB CDS                                                              | 2.01  | 1.04E-74   |
| 304 | hypothetical protein CDS                                              | 2.00  | 1.00E-91   |
| 305 | hypothetical protein CDS                                              | 2.00  | 7.19E-140  |
| 306 | hypothetical protein CDS                                              | 2.00  | 2.38E-48   |
| 307 | hypothetical protein CDS                                              | 2.00  | 1.07E-50   |
| 308 | ssuB CDS                                                              | 1.99  | 1.12E-07   |
| 309 | lacD 1 CDS                                                            | -1.90 | 9.38E-35   |
| 310 | IS200/IS605 family transposase ISLhe65 CDS                            | -1.90 | 1.22E-36   |
| 311 | hypothetical protein CDS                                              | -1.91 | 4.49E-15   |
| 312 | hypothetical protein CDS                                              | -1.91 | 9.88E-67   |
| 313 | hypothetical protein CDS                                              | -1.91 | 1.76E-28   |
| 314 | hypothetical protein CDS                                              | -1.91 | 8.95E-73   |
| 315 | fabG 2 CDS                                                            | -1.93 | 8.12E-84   |
| 316 | hypothetical protein CDS                                              | -1.93 | 4.79E-69   |
| 317 | hypothetical protein CDS                                              | -1.93 | 1.75E-10   |
| 318 | fabG2 CDS                                                             | -1.93 | 6.94E-85   |
| 319 | hypothetical protein CDS                                              | -1.94 | 5.86E-43   |
| 320 | hypothetical protein CDS                                              | -1.94 | 2.06E-44   |
| 321 | hypothetical protein CDS                                              | -1.94 | 0.00400341 |
| 322 | cinA CDS                                                              | -1.94 | 1.37E-77   |
| 323 | tpiA CDS                                                              | -1.95 | 4.28E-71   |
| 324 | hypothetical protein CDS                                              | -1.95 | 7.45E-39   |
| 325 | rplW CDS                                                              | -1.95 | 1.60E-132  |
| 326 | fabZ 1 CDS                                                            | -1.95 | 3.51E-57   |
| 327 | hypothetical protein CDS                                              | -1.95 | 2.10E-13   |
| 328 | regX3 CDS                                                             | -1.96 | 1.11E-42   |
| 329 | hypothetical protein CDS                                              | -1.96 | 2.53E-49   |
| 330 | Putative bifunctional phosphatase/peptidyl-prolyl cis-trans isomerase | -1.97 | 1.94E-83   |
| 331 | gmk 1 CDS                                                             | -1.97 | 2.79E-76   |
| 332 | hypothetical protein CDS                                              | -1.98 | 4.63E-102  |
| 333 | nrdE1 CDS                                                             | -1.98 | 8.51E-101  |
| 334 | hypothetical protein CDS                                              | -1.98 | 2.06E-52   |
| 335 | rplGA CDS                                                             | -1.98 | 1.73E-67   |
| 336 | appA CDS                                                              | -1.99 | 2.96E-122  |
| 337 | sasA 4 CDS                                                            | -1.99 | 6.82E-43   |

|     |                          |       |           |
|-----|--------------------------|-------|-----------|
| 338 | hypothetical protein CDS | -1.99 | 3.66E-43  |
| 339 | fabF CDS                 | -2.00 | 2.18E-86  |
| 340 | efp 1 CDS                | -2.01 | 6.67E-129 |
| 341 | hypothetical protein CDS | -2.01 | 1.56E-32  |
| 342 | lacB CDS                 | -2.01 | 1.72E-34  |
| 343 | hypothetical protein CDS | -2.01 | 9.60E-34  |
| 344 | hypothetical protein CDS | -2.02 | 3.11E-111 |
| 345 | rplB CDS                 | -2.02 | 1.29E-143 |
| 346 | ychF CDS                 | -2.02 | 1.17E-110 |
| 347 | adhE CDS                 | -2.02 | 4.70E-98  |
| 348 | hypothetical protein CDS | -2.02 | 4.58E-16  |
| 349 | hypothetical protein CDS | -2.03 | 2.39E-77  |
| 350 | pstB3 2 CDS              | -2.03 | 7.96E-101 |
| 351 | recU CDS                 | -2.03 | 1.03E-66  |
| 352 | rmlC 1 CDS               | -2.03 | 6.44E-98  |
| 353 | rpoE CDS                 | -2.03 | 4.61E-102 |
| 354 | hypothetical protein CDS | -2.04 | 4.23E-22  |
| 355 | polA CDS                 | -2.05 | 1.62E-101 |
| 356 | hypothetical protein CDS | -2.05 | 8.42E-80  |
| 357 | hypothetical protein CDS | -2.05 | 1.27E-47  |
| 358 | lacA 2 CDS               | -2.06 | 5.28E-26  |
| 359 | rbgA CDS                 | -2.06 | 2.06E-68  |
| 360 | gtfI 1 CDS               | -2.07 | 4.94E-62  |
| 361 | srrA 1 CDS               | -2.07 | 3.44E-107 |
| 362 | hypothetical protein CDS | -2.08 | 2.79E-41  |
| 363 | hypothetical protein CDS | -2.08 | 1.51E-131 |
| 364 | hypothetical protein CDS | -2.09 | 4.67E-61  |
| 365 | uvrC CDS                 | -2.09 | 5.35E-91  |
| 366 | ndk CDS                  | -2.09 | 6.55E-105 |
| 367 | cas2 CDS                 | -2.09 | 1.76E-12  |
| 368 | gtfI 2 CDS               | -2.10 | 3.11E-66  |
| 369 | ffh CDS                  | -2.10 | 6.26E-96  |
| 370 | relA CDS                 | -2.10 | 2.16E-131 |
| 371 | nagB CDS                 | -2.10 | 3.24E-99  |
| 372 | yidA 3 CDS               | -2.11 | 2.72E-69  |
| 373 | dacA 1 CDS               | -2.11 | 1.45E-131 |
| 374 | hypothetical protein CDS | -2.11 | 6.08E-61  |
| 375 | ugpB 1 CDS               | -2.12 | 4.21E-164 |
| 376 | metQ 3 CDS               | -2.12 | 1.20E-61  |
| 377 | ctpA CDS                 | -2.12 | 7.65E-99  |
| 378 | hypothetical protein CDS | -2.12 | 1.28E-79  |
| 379 | hypothetical protein CDS | -2.12 | 8.71E-45  |
| 380 | rpoA CDS                 | -2.13 | 6.25E-162 |

|     |                                    |       |            |
|-----|------------------------------------|-------|------------|
| 381 | bceA 2 CDS                         | -2.13 | 2.26E-79   |
| 382 | hypothetical protein CDS           | -2.13 | 1.67E-76   |
| 383 | hypothetical protein CDS           | -2.13 | 3.90E-144  |
| 384 | hypothetical protein CDS           | -2.14 | 1.39E-82   |
| 385 | ywqD CDS                           | -2.15 | 5.08E-127  |
| 386 | hypothetical protein CDS           | -2.15 | 3.76E-45   |
| 387 | frwD CDS                           | -2.15 | 0.00014857 |
| 388 | hypothetical protein CDS           | -2.15 | 2.71E-28   |
| 389 | hypothetical protein CDS           | -2.15 | 2.27E-160  |
| 390 | pepDA 1 CDS                        | -2.15 | 3.32E-128  |
| 391 | serS CDS                           | -2.16 | 4.62E-147  |
| 392 | hypothetical protein CDS           | -2.16 | 3.48E-37   |
| 393 | php CDS                            | -2.16 | 4.66E-16   |
| 394 | hypothetical protein CDS           | -2.16 | 8.37E-76   |
| 395 | pgk CDS                            | -2.17 | 6.05E-95   |
| 396 | gpmA 3 CDS                         | -2.18 | 3.75E-165  |
| 397 | srrA 3 CDS                         | -2.18 | 1.14E-108  |
| 398 | hypothetical protein CDS           | -2.18 | 2.20E-11   |
| 399 | udk CDS                            | -2.18 | 9.50E-93   |
| 400 | hypothetical protein CDS           | -2.19 | 9.61E-71   |
| 401 | eno2 CDS                           | -2.19 | 5.42E-113  |
| 402 | hypothetical protein CDS           | -2.19 | 2.41E-32   |
| 403 | rpoZ CDS                           | -2.19 | 2.42E-51   |
| 404 | xerC 3 CDS                         | -2.19 | 4.94E-71   |
| 405 | dppE 4 CDS                         | -2.19 | 1.45E-143  |
| 406 | rfbA 1 CDS                         | -2.19 | 1.08E-130  |
| 407 | rpsT CDS                           | -2.20 | 2.27E-135  |
| 408 | kbaY CDS                           | -2.20 | 2.36E-36   |
| 409 | yhfS CDS                           | -2.21 | 1.46E-15   |
| 410 | hypothetical protein CDS           | -2.22 | 5.66E-10   |
| 411 | putative RNA methyltransferase CDS | -2.23 | 3.82E-117  |
| 412 | recR CDS                           | -2.23 | 2.28E-97   |
| 413 | hypothetical protein CDS           | -2.24 | 1.46E-138  |
| 414 | mtnB CDS                           | -2.24 | 3.43E-21   |
| 415 | hypothetical protein CDS           | -2.24 | 3.89E-11   |
| 416 | rpsM CDS                           | -2.24 | 1.11E-108  |
| 417 | hypothetical protein CDS           | -2.25 | 5.64E-13   |
| 418 | hypothetical protein CDS           | -2.25 | 1.14E-31   |
| 419 | hypothetical protein CDS           | -2.25 | 2.72E-46   |
| 420 | grpE CDS                           | -2.25 | 5.05E-107  |
| 421 | hypothetical protein CDS           | -2.25 | 1.68E-119  |
| 422 | hypothetical protein CDS           | -2.25 | 1.09E-133  |
| 423 | oppA 1 CDS                         | -2.26 | 7.36E-171  |

|     |                                       |       |           |
|-----|---------------------------------------|-------|-----------|
| 424 | fpaP 1 CDS                            | -2.26 | 2.89E-92  |
| 425 | soj CDS                               | -2.26 | 1.04E-105 |
| 426 | rpsK CDS                              | -2.27 | 2.46E-125 |
| 427 | rplX CDS                              | -2.27 | 9.41E-107 |
| 428 | acpP 1 CDS                            | -2.27 | 3.84E-68  |
| 429 | hypothetical protein CDS              | -2.28 | 4.09E-43  |
| 430 | pmpR CDS                              | -2.28 | 4.92E-192 |
| 431 | rpsS CDS                              | -2.29 | 6.97E-162 |
| 432 | DegV domain-containing protein CDS    | -2.29 | 2.29E-147 |
| 433 | hypothetical protein CDS              | -2.30 | 4.91E-147 |
| 434 | hypothetical protein CDS              | -2.30 | 3.01E-20  |
| 435 | hypothetical protein CDS              | -2.30 | 1.83E-44  |
| 436 | ccpA CDS                              | -2.30 | 6.97E-119 |
| 437 | ligA 1 CDS                            | -2.30 | 1.52E-12  |
| 438 | def CDS                               | -2.31 | 1.86E-121 |
| 439 | nusA CDS                              | -2.32 | 2.55E-124 |
| 440 | hypothetical protein CDS              | -2.33 | 2.97E-93  |
| 441 | celA 4 CDS                            | -2.33 | 2.33E-24  |
| 442 | hypothetical protein CDS              | -2.33 | 1.30E-29  |
| 443 | cynR CDS                              | -2.34 | 1.20E-105 |
| 444 | hypothetical protein CDS              | -2.34 | 1.09E-167 |
| 445 | valS CDS                              | -2.35 | 3.02E-113 |
| 446 | clpB CDS                              | -2.35 | 5.20E-112 |
| 447 | hypothetical protein CDS              | -2.35 | 7.15E-13  |
| 448 | hypothetical protein CDS              | -2.36 | 1.11E-124 |
| 449 | hypothetical protein CDS              | -2.37 | 2.06E-24  |
| 450 | hypothetical protein CDS              | -2.38 | 9.76E-72  |
| 451 | prfB CDS                              | -2.39 | 6.13E-120 |
| 452 | Putative universal stress protein CDS | -2.39 | 5.24E-171 |
| 453 | hypothetical protein CDS              | -2.39 | 1.38E-71  |
| 454 | xerC 5 CDS                            | -2.40 | 4.30E-104 |
| 455 | hypothetical protein CDS              | -2.40 | 3.98E-127 |
| 456 | pksC CDS                              | -2.41 | 3.14E-120 |
| 457 | Nucleoid-associated protein CDS       | -2.42 | 8.45E-101 |
| 458 | hypothetical protein CDS              | -2.42 | 6.13E-17  |
| 459 | hypothetical protein CDS              | -2.43 | 1.39E-14  |
| 460 | hypothetical protein CDS              | -2.43 | 1.72E-63  |
| 461 | hypothetical protein CDS              | -2.43 | 2.67E-53  |
| 462 | hypothetical protein CDS              | -2.44 | 2.05E-08  |
| 463 | Putative universal stress protein CDS | -2.45 | 2.62E-162 |
| 464 | hypothetical protein CDS              | -2.45 | 1.84E-156 |
| 465 | rplV CDS                              | -2.46 | 5.43E-188 |
| 466 | hypothetical protein CDS              | -2.46 | 2.21E-98  |

|     |                          |       |            |
|-----|--------------------------|-------|------------|
| 467 | rcsC 2 CDS               | -2.47 | 4.54E-175  |
| 468 | lacD 2 CDS               | -2.47 | 1.40E-174  |
| 469 | hypothetical protein CDS | -2.48 | 0.00124017 |
| 470 | brpA 2 CDS               | -2.48 | 8.25E-202  |
| 471 | hypothetical protein CDS | -2.48 | 1.38E-48   |
| 472 | hpf CDS                  | -2.49 | 4.31E-194  |
| 473 | hypothetical protein CDS | -2.49 | 3.11E-54   |
| 474 | noc CDS                  | -2.49 | 2.21E-125  |
| 475 | hypothetical protein CDS | -2.50 | 4.17E-102  |
| 476 | lysN CDS                 | -2.50 | 4.26E-246  |
| 477 | rmlD CDS                 | -2.50 | 4.04E-212  |
| 478 | hypothetical protein CDS | -2.51 | 4.85E-18   |
| 479 | groL CDS                 | -2.52 | 3.75E-194  |
| 480 | accB CDS                 | -2.52 | 1.11E-73   |
| 481 | psaA CDS                 | -2.52 | 1.33E-62   |
| 482 | hypothetical protein CDS | -2.54 | 1.13E-59   |
| 483 | hypothetical protein CDS | -2.54 | 6.05E-05   |
| 484 | hypothetical protein CDS | -2.54 | 5.61E-41   |
| 485 | yybR CDS                 | -2.54 | 4.91E-75   |
| 486 | lacR 1 CDS               | -2.56 | 1.09E-28   |
| 487 | hypothetical protein CDS | -2.56 | 9.75E-165  |
| 488 | spo0J CDS                | -2.57 | 2.27E-143  |
| 489 | hypothetical protein CDS | -2.58 | 2.47E-174  |
| 490 | hypothetical protein CDS | -2.58 | 1.34E-199  |
| 491 | hypothetical protein CDS | -2.59 | 3.45E-35   |
| 492 | mngA CDS                 | -2.59 | 1.64E-07   |
| 493 | tal 2 CDS                | -2.60 | 3.78E-193  |
| 494 | hypothetical protein CDS | -2.60 | 1.12E-36   |
| 495 | rcsC 4 CDS               | -2.60 | 6.29E-159  |
| 496 | recA 2 CDS               | -2.60 | 6.54E-190  |
| 497 | hypothetical protein CDS | -2.60 | 3.90E-132  |
| 498 | TelA-like protein CDS    | -2.61 | 1.14E-171  |
| 499 | rpsB CDS                 | -2.61 | 5.50E-174  |
| 500 | naiP CDS                 | -2.61 | 6.55E-211  |
| 501 | hypothetical protein CDS | -2.62 | 1.79E-170  |
| 502 | nagZ CDS                 | -2.62 | 3.42E-78   |
| 503 | rpsC CDS                 | -2.62 | 6.20E-192  |
| 504 | ldh 3 CDS                | -2.63 | 4.77E-216  |
| 505 | hypothetical protein CDS | -2.63 | 6.07E-161  |
| 506 | hit CDS                  | -2.64 | 4.75E-106  |
| 507 | immR CDS                 | -2.64 | 5.24E-93   |
| 508 | clpE CDS                 | -2.64 | 6.32E-130  |
| 509 | rmlB 1 CDS               | -2.65 | 3.65E-253  |



|     |                                          |       |           |
|-----|------------------------------------------|-------|-----------|
| 510 | hypothetical protein CDS                 | -2.66 | 2.72E-19  |
| 511 | yceM CDS                                 | -2.66 | 3.35E-192 |
| 512 | hypothetical protein CDS                 | -2.67 | 3.10E-78  |
| 513 | rpiA CDS                                 | -2.68 | 1.89E-101 |
| 514 | hypothetical protein CDS                 | -2.68 | 1.04E-179 |
| 515 | hypothetical protein CDS                 | -2.71 | 1.03E-25  |
| 516 | hypothetical protein CDS                 | -2.71 | 1.08E-92  |
| 517 | hypothetical protein CDS                 | -2.74 | 2.05E-122 |
| 518 | hypothetical protein CDS                 | -2.74 | 9.84E-113 |
| 519 | dnaK CDS                                 | -2.75 | 8.22E-248 |
| 520 | hypothetical protein CDS                 | -2.76 | 4.05E-111 |
| 521 | hypothetical protein CDS                 | -2.76 | 6.49E-41  |
| 522 | rplN CDS                                 | -2.77 | 1.13E-154 |
| 523 | hypothetical protein CDS                 | -2.77 | 2.49E-08  |
| 524 | hypothetical protein CDS                 | -2.78 | 2.64E-37  |
| 525 | rpmC CDS                                 | -2.78 | 2.84E-163 |
| 526 | hypothetical protein CDS                 | -2.79 | 6.59E-17  |
| 527 | hypothetical protein CDS                 | -2.80 | 5.09E-75  |
| 528 | hypothetical protein CDS                 | -2.80 | 4.67E-146 |
| 529 | hypothetical protein CDS                 | -2.81 | 1.49E-195 |
| 530 | mntA CDS                                 | -2.84 | 2.22E-89  |
| 531 | hypothetical protein CDS                 | -2.85 | 1.28E-113 |
| 532 | D-2-hydroxyisocaproate dehydrogenase CDS | -2.85 | 1.45E-216 |
| 533 | rpsQ CDS                                 | -2.87 | 1.70E-243 |
| 534 | hypothetical protein CDS                 | -2.90 | 1.48E-163 |
| 535 | gltX CDS                                 | -2.90 | 6.57E-302 |
| 536 | hypothetical protein CDS                 | -2.92 | 6.19E-304 |
| 537 | hypothetical protein CDS                 | -2.92 | 1.27E-241 |
| 538 | Nitronate monooxygenase CDS              | -2.93 | 3.53E-162 |
| 539 | hypothetical protein CDS                 | -2.95 | 2.83E-69  |
| 540 | hypothetical protein CDS                 | -2.98 | 2.92E-79  |
| 541 | hypothetical protein CDS                 | -2.98 | 2.63E-286 |
| 542 | hypothetical protein CDS                 | -2.99 | 9.93E-211 |
| 543 | frr CDS                                  | -2.99 | 1.61E-240 |
| 544 | hypothetical protein CDS                 | -3.01 | 1.84E-138 |
| 545 | hypothetical protein CDS                 | -3.01 | 2.86E-237 |
| 546 | rplP CDS                                 | -3.02 | 1.93E-248 |
| 547 | hypothetical protein CDS                 | -3.07 | 5.32E-40  |
| 548 | hypothetical protein CDS                 | -3.09 | 6.32E-273 |
| 549 | hypothetical protein CDS                 | -3.11 | 2.84E-134 |
| 550 | hypothetical protein CDS                 | -3.17 | 2.27E-79  |
| 551 | degA 2 CDS                               | -3.19 | 1.12E-76  |
| 552 | hypothetical protein CDS                 | -3.20 | 4.13E-269 |

|     |                                                                                                                                            |                                           |                                        |
|-----|--------------------------------------------------------------------------------------------------------------------------------------------|-------------------------------------------|----------------------------------------|
| 553 | hypothetical protein CDS                                                                                                                   | -3.21                                     | 2.51E-151                              |
| 554 | hypothetical protein CDS                                                                                                                   | -3.21                                     | 9.49E-153                              |
| 555 | hypothetical protein CDS                                                                                                                   | -3.24                                     | 1.82E-199                              |
| 556 | yqeY CDS                                                                                                                                   | -3.26                                     | 2.18E-214                              |
| 557 | hypothetical protein CDS                                                                                                                   | -3.28                                     | 1.20E-218                              |
| 558 | hypothetical protein CDS                                                                                                                   | -3.29                                     | 7.26E-203                              |
| 559 | prsA 1 CDS                                                                                                                                 | -3.32                                     | 0                                      |
| 560 | rpsU CDS                                                                                                                                   | -3.35                                     | 5.06E-229                              |
| 561 | fabH CDS                                                                                                                                   | -3.36                                     | 0                                      |
| 562 | hypothetical protein CDS                                                                                                                   | -3.36                                     | 1.30E-57                               |
| 563 | hypothetical protein CDS                                                                                                                   | -3.40                                     | 1.44E-233                              |
| 564 | hypothetical protein CDS                                                                                                                   | -3.42                                     | 6.25E-147                              |
| 565 | hypothetical protein CDS                                                                                                                   | -3.43                                     | 0                                      |
| 566 | hypothetical protein CDS                                                                                                                   | -3.51                                     | 2.80E-91                               |
| 567 | hypothetical protein CDS                                                                                                                   | -3.56                                     | 5.34E-146                              |
| 568 | hypothetical protein CDS                                                                                                                   | -3.59                                     | 3.22E-61                               |
| 569 | hypothetical protein CDS                                                                                                                   | -3.64                                     | 8.27E-81                               |
| 570 | hypothetical protein CDS                                                                                                                   | -3.71                                     | 4.94E-205                              |
| 571 | hypothetical protein CDS                                                                                                                   | -3.75                                     | 5.23E-214                              |
| 572 | acpP 2 CDS                                                                                                                                 | -3.77                                     | 7.38E-303                              |
| 573 | hypothetical protein CDS                                                                                                                   | -3.86                                     | 0                                      |
| 574 | tig CDS                                                                                                                                    | -3.99                                     | 0                                      |
| 575 | hypothetical protein CDS                                                                                                                   | -4.04                                     | 3.01E-185                              |
| 576 | hypothetical protein CDS                                                                                                                   | -4.75                                     | 0                                      |
| 577 | hypothetical protein CDS                                                                                                                   | -5.99                                     | 0                                      |
|     |                                                                                                                                            |                                           |                                        |
|     | <b>Lactiplantibacillus plantarum Lp-115</b>                                                                                                |                                           |                                        |
|     | <b>Name</b>                                                                                                                                | <b>Differential Expression Log2 Ratio</b> | <b>Differential Expression p-value</b> |
| 1   | Transcriptional regulator, PadR family CDS                                                                                                 | 2.39                                      | 8.22E-27                               |
| 2   | Diaminohydroxyphosphoribosylaminopyrimidine deaminase (EC 3.5.4.26) / 5-amino-6-(5-phosphoribosylamino)uracil reductase (EC 1.1.1.193) CDS | 2.00                                      | 2.75E-37                               |
| 3   | Di-tripeptide/cation symporter DtpT CDS                                                                                                    | 1.97                                      | 1.18E-14                               |
| 4   | Permease of the drug/metabolite transporter (DMT) superfamily CDS                                                                          | 1.94                                      | 2.77E-10                               |
| 5   | Riboflavin synthase eubacterial/eukaryotic (EC 2.5.1.9) CDS                                                                                | 1.92                                      | 3.49E-32                               |
| 6   | Cold shock protein of CSP family CDS                                                                                                       | 1.91                                      | 7.86E-09                               |
| 7   | Cold shock protein of CSP family CDS                                                                                                       | 1.91                                      | 1.79E-11                               |
| 8   | hypothetical protein CDS                                                                                                                   | -1.91                                     | 4.03E-26                               |
| 9   | prophage Lp2 protein 45 CDS                                                                                                                | -1.93                                     | 1.22E-20                               |
| 10  | hypothetical protein CDS                                                                                                                   | -1.93                                     | 2.27E-23                               |
| 11  | integral membrane protein CDS                                                                                                              | -1.95                                     | 3.44E-19                               |
| 12  | hypothetical protein CDS                                                                                                                   | -1.95                                     | 2.65E-12                               |
| 13  | Putative prophage protein (ps3) CDS                                                                                                        | -1.98                                     | 1.41E-30                               |
| 14  | hypothetical protein CDS                                                                                                                   | -1.99                                     | 1.85E-25                               |

|    |                                                        |       |          |
|----|--------------------------------------------------------|-------|----------|
| 15 | hypothetical protein CDS                               | -1.99 | 3.07E-22 |
| 16 | Heat shock protein GrpE CDS                            | -1.99 | 1.41E-12 |
| 17 | hypothetical protein CDS                               | -2.02 | 6.20E-39 |
| 18 | prophage Lp1 protein 45 CDS                            | -2.03 | 2.01E-24 |
| 19 | prophage Lp1 protein 48 CDS                            | -2.07 | 2.29E-28 |
| 20 | hypothetical protein CDS                               | -2.13 | 5.27E-16 |
| 21 | hypothetical protein CDS                               | -2.15 | 1.02E-37 |
| 22 | integral membrane protein CDS                          | -2.16 | 4.97E-11 |
| 23 | hypothetical protein CDS                               | -2.16 | 2.94E-25 |
| 24 | hypothetical protein CDS                               | -2.19 | 2.00E-39 |
| 25 | Exonuclease SbcC CDS                                   | -2.22 | 5.62E-44 |
| 26 | hypothetical protein CDS                               | -2.23 | 5.77E-29 |
| 27 | Transcriptional regulator CDS                          | -2.23 | 6.62E-16 |
| 28 | hypothetical protein CDS                               | -2.24 | 8.23E-42 |
| 29 | Chaperone protein DnaK CDS                             | -2.25 | 3.45E-20 |
| 30 | hypothetical protein CDS                               | -2.26 | 3.73E-52 |
| 31 | hypothetical protein CDS                               | -2.28 | 3.29E-21 |
| 32 | prophage Lp1 protein 5 CDS                             | -2.29 | 2.11E-32 |
| 33 | Hypothetical protein SAV1845 CDS                       | -2.30 | 1.89E-48 |
| 34 | DNA-cytosine methyltransferase (EC 2.1.1.37) CDS       | -2.30 | 4.38E-50 |
| 35 | Predicted transcriptional regulators CDS               | -2.34 | 1.09E-40 |
| 36 | hypothetical protein CDS                               | -2.35 | 1.41E-41 |
| 37 | Replication initiation protein A CDS                   | -2.35 | 3.72E-50 |
| 38 | PTS IIA-like nitrogen-regulatory protein PtsN CDS      | -2.42 | 3.09E-39 |
| 39 | hypothetical protein CDS                               | -2.44 | 8.67E-33 |
| 40 | Transcription antiterminator, BglG family CDS          | -2.45 | 3.01E-58 |
| 41 | prophage Lp2 protein 32 CDS                            | -2.45 | 7.07E-27 |
| 42 | hypothetical protein CDS                               | -2.47 | 1.84E-62 |
| 43 | hypothetical protein CDS                               | -2.48 | 1.28E-36 |
| 44 | Phage transcriptional activator RinA CDS               | -2.52 | 3.63E-62 |
| 45 | hypothetical protein CDS                               | -2.58 | 9.37E-42 |
| 46 | cell surface protein precursor CDS                     | -2.59 | 7.18E-39 |
| 47 | hypothetical protein CDS                               | -2.59 | 8.91E-24 |
| 48 | cell surface protein precursor CDS                     | -2.59 | 1.90E-15 |
| 49 | hypothetical protein CDS                               | -2.67 | 1.08E-44 |
| 50 | FIG00754769: hypothetical protein CDS                  | -2.69 | 6.63E-28 |
| 51 | extracellular protein CDS                              | -2.70 | 8.48E-59 |
| 52 | hypothetical protein CDS                               | -2.76 | 4.64E-74 |
| 53 | Prophage Lp1 protein 19 CDS                            | -2.79 | 1.25E-60 |
| 54 | DNA topoisomerase III (EC 5.99.1.2) CDS                | -2.80 | 6.75E-41 |
| 55 | hypothetical protein CDS                               | -2.81 | 7.58E-38 |
| 56 | putative plasmid partition protein CDS                 | -2.82 | 1.95E-51 |
| 57 | immunity repressor protein (phage-related protein) CDS | -2.82 | 2.68E-60 |

|    |                                                                   |       |           |
|----|-------------------------------------------------------------------|-------|-----------|
| 58 | hypothetical protein CDS                                          | -2.84 | 3.32E-25  |
| 59 | hypothetical protein CDS                                          | -2.89 | 3.66E-42  |
| 60 | hypothetical protein CDS                                          | -2.92 | 2.93E-50  |
| 61 | prophage Lp2 protein 25 CDS                                       | -2.92 | 1.99E-43  |
| 62 | unknown CDS                                                       | -2.94 | 1.91E-31  |
| 63 | FIG00745688: hypothetical protein CDS                             | -2.98 | 4.80E-53  |
| 64 | putative antirepressor protein CDS                                | -2.99 | 5.48E-72  |
| 65 | DNA-damage-inducible gene CDS                                     | -3.09 | 2.12E-57  |
| 66 | cell surface protein precursor CDS                                | -3.12 | 1.66E-49  |
| 67 | hypothetical protein CDS                                          | -3.12 | 6.00E-51  |
| 68 | hypothetical protein CDS                                          | -3.12 | 1.18E-37  |
| 69 | hypothetical protein CDS                                          | -3.12 | 7.26E-59  |
| 70 | hypothetical protein CDS                                          | -3.14 | 5.33E-64  |
| 71 | prophage Lp1 protein 17 CDS                                       | -3.16 | 3.06E-76  |
| 72 | hypothetical protein CDS                                          | -3.18 | 6.47E-44  |
| 73 | prophage Lp2 protein 12 CDS                                       | -3.22 | 2.87E-53  |
| 74 | Recombinational DNA repair protein RecT (prophage associated) CDS | -3.27 | 1.25E-71  |
| 75 | prophage Lp2 protein 11 CDS                                       | -3.27 | 4.36E-59  |
| 76 | hypothetical protein CDS                                          | -3.29 | 2.88E-66  |
| 77 | hypothetical protein CDS                                          | -3.32 | 3.41E-74  |
| 78 | hypothetical protein CDS                                          | -3.35 | 1.74E-56  |
| 79 | hypothetical protein CDS                                          | -3.47 | 4.24E-92  |
| 80 | hypothetical protein CDS                                          | -3.47 | 5.89E-78  |
| 81 | hypothetical protein CDS                                          | -3.50 | 1.22E-80  |
| 82 | hypothetical protein CDS                                          | -3.53 | 1.58E-60  |
| 83 | FIG00742586: hypothetical protein CDS                             | -3.54 | 1.29E-52  |
| 84 | hypothetical protein CDS                                          | -3.61 | 7.79E-56  |
| 85 | hyp.protein CDS replisome organizer                               | -3.61 | 1.77E-102 |
| 86 | hypothetical protein CDS                                          | -3.64 | 7.68E-77  |
| 87 | Nickase CDS                                                       | -3.70 | 1.52E-78  |
| 88 | DNA replication protein CDS                                       | -3.92 | 1.62E-110 |
